# Supplementary material for: The significance of bromide in the Brust–Schiffrin synthesis of thiol protected gold nanoparticles
Source: Royal Society of Chemistry journal article supplement (doi:10.1039/c7sc03266h), 2017-01-01
Supplement: c7sc03266h1.pdf [file c7sc03266h1.pdf]

# The Significance of Bromide in the Brust-Schiffrin Synthesis of Thiol Protected Gold Nanoparticles

Samuel G. Booth,<sup>a</sup> Akihiro Uehara,<sup>b,\*</sup> Sin Yuen Chang,<sup>c</sup> Camille La Fontaine,<sup>d</sup> Toshiyuki Fujii,<sup>e</sup> Yoshihiro Okamoto,<sup>f</sup> Takahito Imai,<sup>g</sup> Sven L. M. Schroeder,<sup>c,h</sup> and Robert A. W. Dryfe<sup>a,\*</sup>

<sup>a</sup> School of Chemistry, University of Manchester, Manchester, M13 9PL, UK

<sup>b</sup> Division of Nuclear Engineering Science, Research Reactor Institute, Kyoto University, Kumatori, Sennan, Osaka, 590-0494, Japan

<sup>c</sup> Diamond Light Source Ltd., Didcot, Oxfordshire OX11 0DE, UK

<sup>d</sup> Synchrotron Soleil, L'Orme des Merisiers, Saint-Aubin, BP48, 91192, Gif-sur-Yvette, France

<sup>e</sup> Division of Sustainable Energy and Environmental Engineering, Graduate School of Engineering, Osaka University, Suita, Osaka, 565-0871, Japan

<sup>f</sup> Materials Sciences Research Center, Japan Atomic Energy Agency, 2-4, Shirakata, Tokai, Naka, Ibaraki, 319-1195, Japan

<sup>g</sup> Department of Materials Chemistry, Faculty of Science and Technology, Ryukoku University, Otsu, Shiga 520-2194, Japan

<sup>h</sup> School of Chemical and Process Engineering, University of Leeds, Leeds LS2 9JT, UK

## Supporting Information

## Halide ion exchange between the phase transfer catalyst TOABr and the gold species $[\text{AuCl}_4]^-$

The addition of TOABr in either a single organic phase or in a 2 phase system shows the exchange of  $\text{Cl}^-$  for  $\text{Br}^-$  resulting in the formation of a mixed halide gold species. The full fitting for the EXAFS parameters used to describe the data in Figure 2 is included in Table S1.

|                          | $[\text{AuBr}_4]^-$ | $[\text{AuCl}_4]^-$ | R-factor $k^3$<br>weighted data |
|--------------------------|---------------------|---------------------|---------------------------------|
| 1 eq TOABr               | 0.41 +/- 0.022      | 0.59 +/- 0.022      | 0.0083                          |
| 2 eq TOABr               | 0.54 +/- 0.023      | 0.46 +/- 0.023      | 0.0052                          |
| 3 eq TOABr               | 0.66 +/- 0.039      | 0.34 +/- 0.039      | 0.0045                          |
| 4 eq TOABr               | 0.75 +/- 0.019      | 0.25 +/- 0.019      | 0.0040                          |
| 5 eq TOABr               | 0.77 +/- 0.054      | 0.23 +/- 0.054      | 0.0157                          |
| Pure $[\text{AuBr}_4]^-$ | 1.00 +/- 0.000      | 0.00 +/- 0.000      | 0.0124                          |

**Table S1.** Fitting parameters for each path in the EXAFS analysis of the addition of TOABr to  $[\text{AuCl}_4]^-$  in a single phase (Figure 2).

To examine the electrochemical response, the voltammetry and half wave potentials for the heterogeneous reaction are shown in Figure S1. The measurements indicate a shift in the ion transfer potential upon interaction with a high concentration of TOABr. The response is the same for both the heterogeneous interaction as well as for the homogeneous interactions in an organic phase.

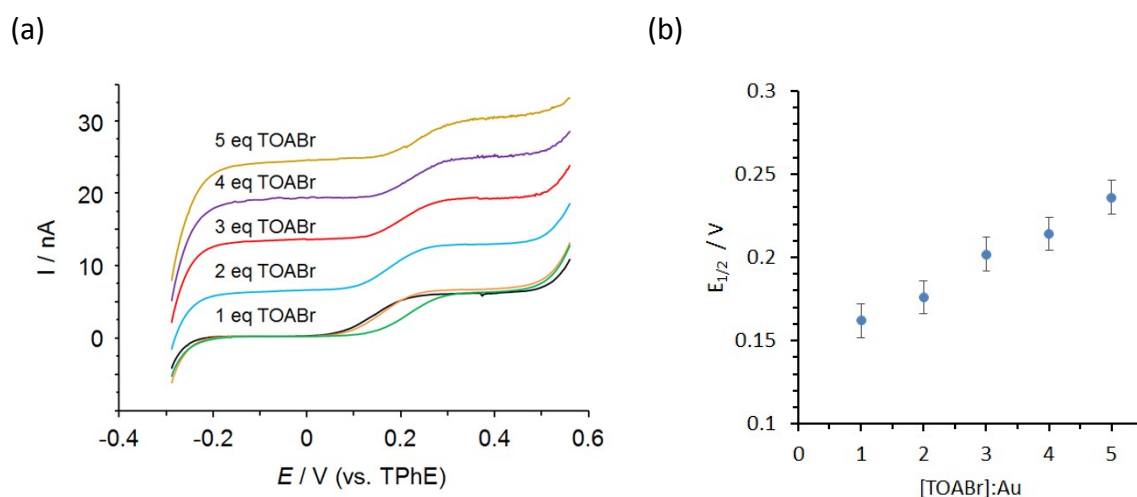

**Figure S1.** Voltammetry at a micro-liquid/liquid interface following the interaction of (a)  $\text{H}^+[\text{AuCl}_4]^-$  with TOABr. The green curve corresponds to pure  $[\text{AuBr}_4]^-$  and the black curve to pure  $[\text{AuCl}_4]^-$ . (b) Shift in half wave potential in the liquid/liquid voltammetry on increasing TOABr: Au ratio.

The experimental conditions used to generate the above data and that in Figure 3 are included in Table S2. After shaking and phase separation, the DCE phase was used in the voltammetric measurements.

(a)

| Aqueous Phase             | Organic Phase                       |
|---------------------------|-------------------------------------|
| 0.2 mM HAuCl <sub>4</sub> | 0, 0.2, 0.4, 0.6, 0.8 or 1 mM TOABr |
| 10 mM HCl                 | 1 mM TOATFPB                        |

(b)

| Aqueous Phase | Organic Phase                       |
|---------------|-------------------------------------|
|               | 0.2 mM TOA AuCl <sub>4</sub>        |
| 10 mM HCl     | 0, 0.2, 0.4, 0.6, 0.8 or 1 mM TOABr |
|               | 1 mM TOATFPB                        |

**Table S2.** Experimental conditions used in the liquid/liquid electrochemical measurements following the interaction of [AuCl<sub>4</sub>]<sup>-</sup> (a) at the liquid/liquid interface and (b) in a single organic phase.

### Reduction of [AuBr<sub>4</sub>]<sup>-</sup> by 1-dodecanethiol

The addition of thiol to [AuBr<sub>4</sub>]<sup>-</sup> was monitored by XAFS as described in the main paper. The EXAFS data was fit using a combination of scattering paths to describe either the contribution from [AuBr<sub>4</sub>]<sup>-</sup> or [AuBr<sub>2</sub>]<sup>-</sup>. The parameters determined through EXAFS fitting that contributed to the plots in Figure 5 a and b are included below in Table S3.

|                                        | [AuBr <sub>4</sub> ] <sup>-</sup> | [AuBr <sub>2</sub> ] <sup>-</sup> | R-factor k <sup>3</sup><br>weighted data |
|----------------------------------------|-----------------------------------|-----------------------------------|------------------------------------------|
| Pure [AuBr <sub>4</sub> ] <sup>-</sup> | 1.00 +/- 0.000                    | 0.00 +/- 0.000                    | 0.0304                                   |
| 0.4 eq Thiol                           | 0.79 +/- 0.082                    | 0.21 +/- 0.082                    | 0.0238                                   |
| 1.0 eq Thiol                           | 0.44 +/- 0.114                    | 0.56 +/- 0.114                    | 0.0156                                   |
| 2.0 eq Thiol                           | 0.02 +/- 0.090                    | 0.98 +/- 0.090                    | 0.0049                                   |
| 10.0 eq Thiol                          | 0.03 +/- 0.124                    | 0.97 +/- 0.124                    | 0.0231                                   |

**Table S3.** Fitting parameters for each path in the EXAFS analysis of the addition of 1-dodecane thiol to [AuBr<sub>4</sub>]<sup>-</sup> in a single phase.

This interaction was also verified by electrochemistry, whereby the variation in Gibbs energy of transfer on reduction of  $[\text{AuBr}_4]^-$  can be followed by voltammetry at the micro-liquid/liquid interface. As there is no increase in halide ion transfer, which would indicate the formation of Au(I)thiolate species, it is clear that the only reduction process is that of  $[\text{AuBr}_4]^-$  forming  $[\text{AuBr}_2]^-$ . In order to quantify the extent of exchange the  $[\text{AuBr}_4]^-$  response is subtracted from the signals to show the contribution of  $[\text{AuBr}_2]^-$ . Figure S2 indicates the response due to  $[\text{AuBr}_2]^-$ . The resultant extent of reduction is shown in Figure 6.

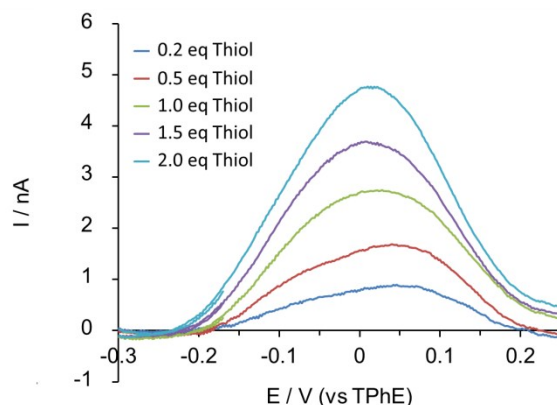

**Figure S2.** Peak current corresponding to  $[\text{AuBr}_2]^-$  following subtraction of  $[\text{AuBr}_4]^-$  species in the cyclic voltammogram. The thiol and gold species were mixed for 30 minutes prior to measurement.

The progression of the reaction with different thiol concentrations can be seen by the clear loss of color in the organic phase on addition of excess thiol.  $[\text{AuBr}_4]^-$  forms a dark orange solution whilst  $[\text{AuBr}_2]^-$  is colorless therefore the extent of the reduction can be seen in the solution formed in the intermediate step in the reduction protocol (Figure S3).

(a)

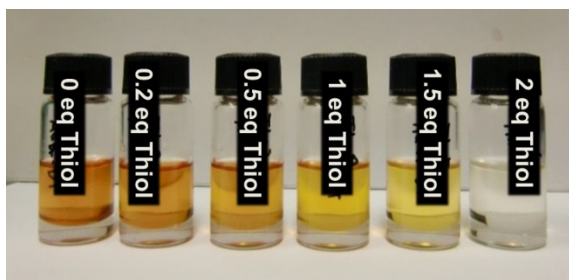

(b)

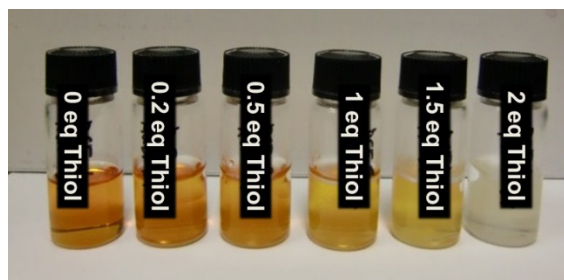

**Figure S3.** Variation in solution appearance after 24 hours of reaction between  $[\text{AuBr}_4]^-$  and thiol at different ratios in (a) toluene and (b) DCE. Left to right the solutions used 0, 0.2, 0.5, 1, 1.5 and 2 equivalents of thiol.

## Reduction by $\text{BH}_4^-$ to form Au nanoparticles: influence of solvent

Following the reduction process the formation of nanoparticles can be confirmed by UV-Vis spectroscopy. This is shown in the main paper for the reduction in toluene. The same reaction was repeated in DCE to compare the efficiency in the different solvents. The UV-Vis response clearly indicates that there is a lower yield of nanoparticles in DCE than toluene (Figure S4). In the absence of thiol there is almost no signal as the majority of the gold nanoparticles rapidly aggregate and sediment out of solution due to the absence of surface protecting groups.

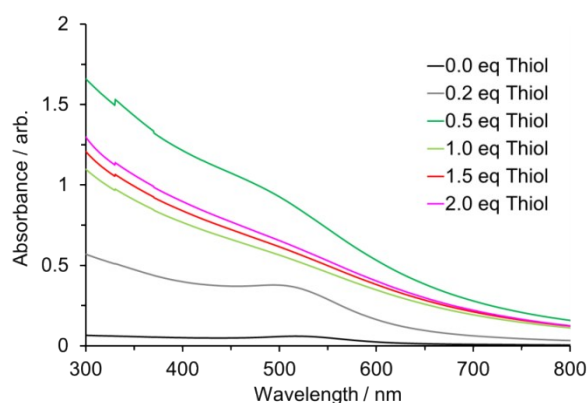

**Figure S4.** UV-Vis absorbance of gold nanoparticles synthesized in DCE.

Significantly, the sample in the absence of thiol results in the formation of aggregated particles in DCE as would be expected. This is different to the observation in toluene where the nanoparticles are stabilized even in the absence of thiol (Figure S5). Even at high thiol: Au ratios (>3) nanoparticles are still synthesized in a good yield and form a stable suspension.

(a)

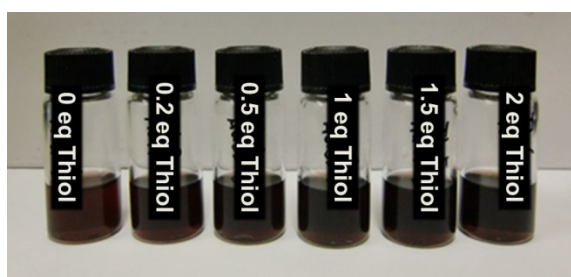

(b)

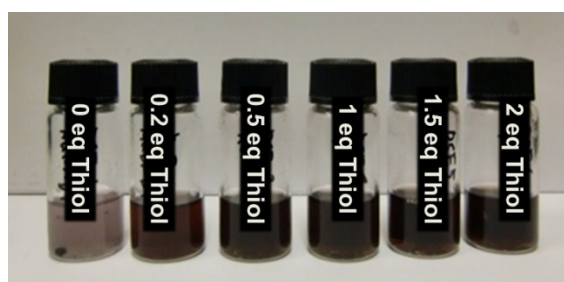

**Figure S5.** Gold nanoparticle solutions formed at different thiol: Au ratios. Left to right the solutions used 0, 0.2, 0.5, 1, 1.5 and 2 equivalents of thiol. The nanoparticles were synthesized in (a) toluene and (b) DCE.

## Reduction by $\text{BH}_4^-$ to form Au nanoparticles influence of Au precursor species

The variation in deposition products formed using either  $[\text{AuCl}_4]^-$  or  $[\text{AuBr}_4]^-$  as the reaction precursor was examined by TEM and UV-Vis spectroscopy. The reaction was performed using 1:1 and 3:1 thiol: Au ratios (1.5 mM to 0.5 mM) and  $\text{NaBH}_{4(\text{aq})}$  or  $\text{TBABH}_{4(\text{DCE})}$  as reported in the main paper. Figure S6 shows the TEM micrographs of the particles formed at different thiol/Au ratios using  $[\text{AuBr}_4]^-$  or  $[\text{AuCl}_4]^-$  in the reaction. As has been reported previously [15],  $[\text{AuBr}_4]^-$  species tend to form slightly larger nanoparticles than  $[\text{AuCl}_4]^-$ . In both cases, a higher thiol to gold ratio produces smaller nanoparticles as demonstrated throughout the literature [26].

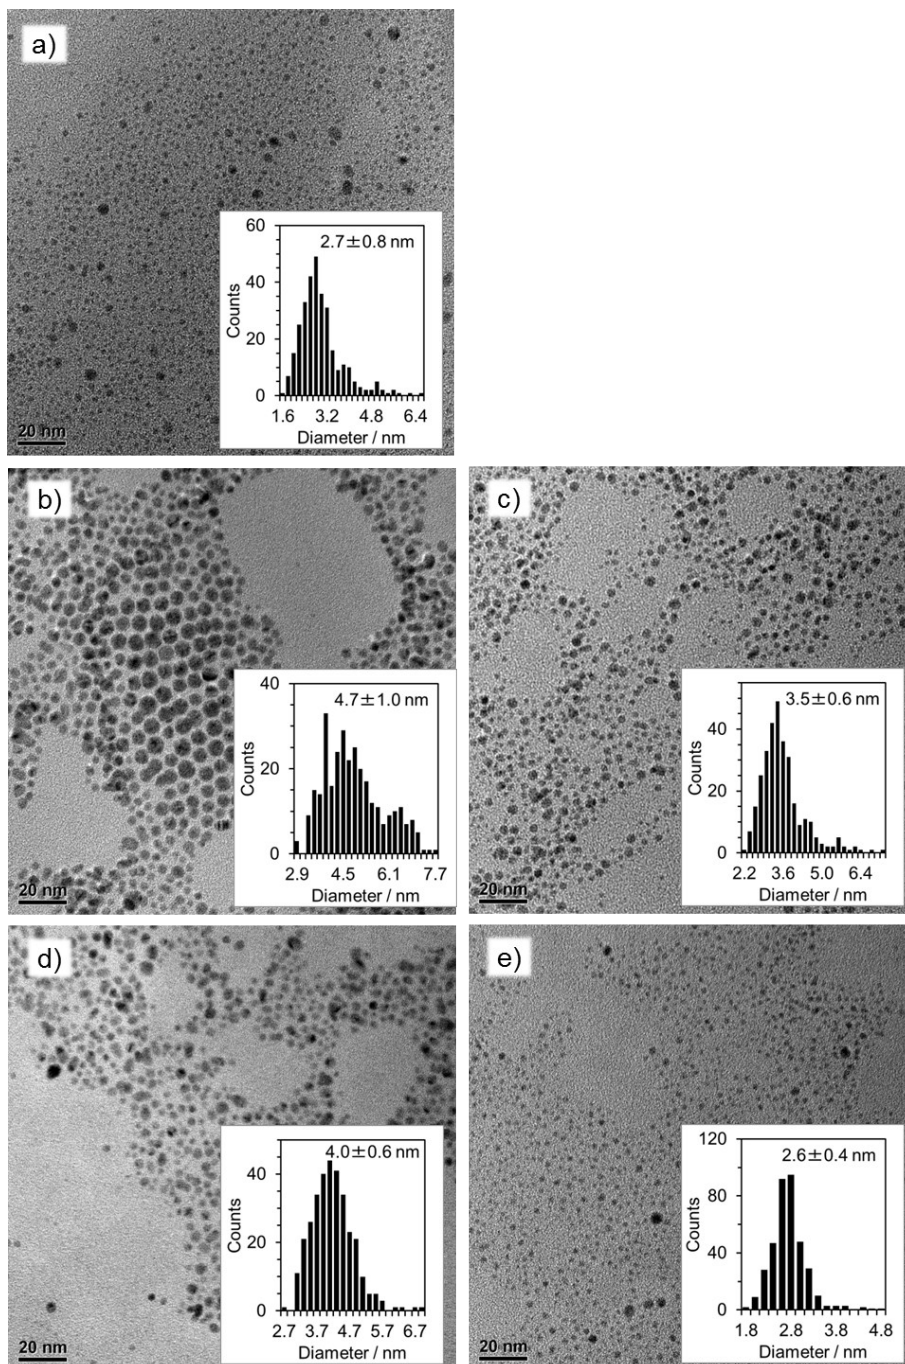

**Figure S6.** TEM micrographs of the gold nanoparticle products formed under conditions of (a)  $[\text{AuBr}_4]^-$  with 0 eq thiol, (b)  $[\text{AuBr}_4]^-$  and 1 eq thiol, (c)  $[\text{AuCl}_4]^-$  and 1 eq thiol, (d)  $[\text{AuBr}_4]^-$  and 3 eq thiol and (e)  $[\text{AuCl}_4]^-$  and 3 eq thiol.

In the absence of thiol, the  $[\text{AuBr}_4]^-$  produces a very low yield of large particles (5-6 nm). However, as can be seen from the TEM this reaction also forms a large number of much smaller particles.

Figure S7 indicates the variation in UV-Vis response for nanoparticles formed by the reduction of  $[\text{AuCl}_4]^-$  and  $[\text{AuBr}_4]^-$  (0.5 mM) by thiol (1.5 mM) and  $\text{NaBH}_4(\text{Aq})$  or  $\text{TBABH}_4(\text{DCE})$  (10 mM). The UV-Vis data suggests that the particles are formed at a slightly higher concentration when using  $[\text{AuBr}_4]^-$  as opposed to  $[\text{AuCl}_4]^-$ .

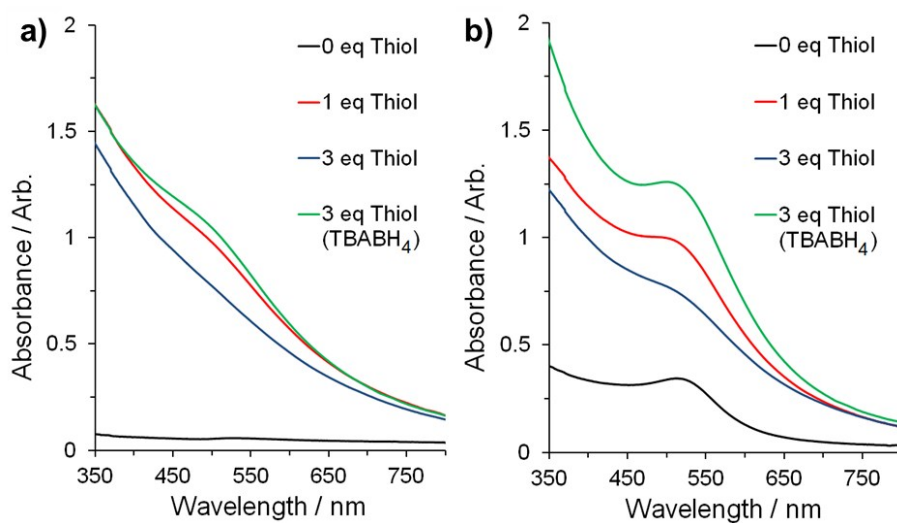

**Figure S7.** UV-Vis of the gold nanoparticles synthesized at different thiol/Au ratios using either (a)  $[\text{AuCl}_4]^-$  or (b)  $[\text{AuBr}_4]^-$  as the precursor species

The nanoparticles formed using organic phase  $\text{BH}_4^-$  in a water free synthesis reaction (Figure 8) clearly form a more uniform product at a higher yield (Figure S7) than those formed using  $\text{NaBH}_4$  in an aqueous phase (Figure S6).



The reactant conditions used in the original Brust-Schiffrin synthesis are included for reference (Table S4).

(a)

| <b>Aqueous Phase<br/>(30 mL)</b> | <b>Toluene<br/>(80 mL)</b> |
|----------------------------------|----------------------------|
| 30 mM HAuCl <sub>4</sub>         | 50 mM TOABr                |

After Au phase transfer, the phases are separated and thiol is added to the toluene phase. The aqueous NaBH<sub>4</sub> solution is then added.

(b)

| <b>Aqueous Phase (25 mL)</b> | <b>Toluene (80 mL)</b>                                                                            |
|------------------------------|---------------------------------------------------------------------------------------------------|
| 400 mM NaBH <sub>4</sub>     | 11.25 mM TOAAuCl <sub>4</sub>                                                                     |
|                              | 39 mM TOABr (will react with [AuCl <sub>4</sub> ] <sup>-</sup> and BH <sub>4</sub> <sup>-</sup> ) |
|                              | 10 mM RSH                                                                                         |

**Table S4.** (a) and (b) the concentrations and volumes of solution used in the original Brust-Schiffrin procedure.

The side reactions that may occur in the Brust-Schiffrin process at low TOABr concentration are provided schematically in Figure S8. This reaction occurs as a minor product even at low thiol concentration but then becomes the main reaction pathway at high thiol concentrations.

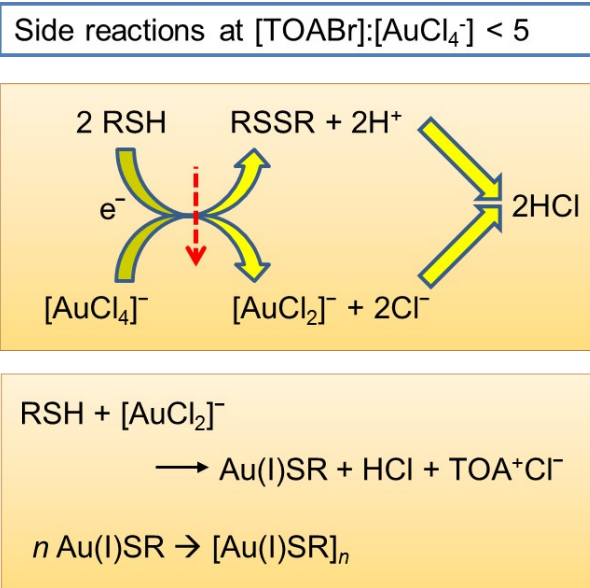

Note: Au(I)SR forms as a white precipitate,  $[\text{Au(I)SR}]_n$ , which is not reduced by  $\text{BH}_4^-$ .

**Figure S8.** Schematic showing the side reaction that occurs on addition of thiol when  $[\text{AuCl}_4]^-$  is the precursor gold species.
